# Supplementary material for: The effect of heteroatoms at end groups of anthracene derivatives on the photoelectric properties and crystal/film morphology: a theoretical perspective
Source: Royal Society of Chemistry journal article supplement (doi:10.1039/d3tc01443f), 2023-01-01
Supplement: d3tc01443f1.pdf [file d3tc01443f1.pdf]

## Supporting Information

# **The effect of heteroatoms at end groups of anthracene derivatives on the photoelectric properties and crystal/film morphology: a theoretical perspective**

Gui-Ya Qin,<sup>a</sup> Xiao-Qi Sun,<sup>b</sup> Pan-Pan Lin,<sup>a,c</sup> Xue Wei,<sup>a</sup> Jing-Fu Guo,<sup>b</sup> Wei-Bo Cui,<sup>a</sup> Jian-Xun Fan,<sup>d</sup> Hui Li,<sup>a</sup> Lu-yi Zou,<sup>a</sup> and Ai-min Ren<sup>\*a</sup>

*a. College of Chemistry, Jilin University, Changchun, 130023, China*

*b. School of Physics, Northeast Normal University, Changchun 130024, P.R. China*

*c. College of Chemistry and Chemical Engineering, Qiqihar University, Qiqihar, 161006, P.R. China.*

*d. College of Chemistry and Materials Science, Weinan Normal University, Weinan 714000, China.*

Corresponding Authors: Ai-min Ren

E-mail: [renam@jlu.edu.cn](mailto:renam@jlu.edu.cn)

## Part 1: Selection of Calculation Method

For small organic molecules and solid systems, the most commonly used functionals to calculate the basic electronic structural properties are PBE0 (25% Hartree–Fock exchange) and B3LYP (20% Hartree–Fock exchange). The B3LYP and PBE0 are recognized as hybrid functional with higher accuracy and affordable computation cost. In order to avoid ignoring other more suitable functional, we used different functionals (B3LYP, PBE0, M062X, wb97xd, CAM-B3LYP functionals) and different basis sets (6-31g(d), 6-31g(d,p), 6-31+g(d,p)) to test the charge transport and luminescence properties of studied systems. Considering the charge transport and luminescence properties are measured in the thin-film environment, the ONIOM model is considered to simulate the solid phase environment.

According to the HOMO/LUMO measured in experiment, we found that the B3LYP/6-31+g(d,p) and PBE0/6-31+g(d,p) method are the closer to the experimental measurement. Moreover, examining the effect of different basis sets on the calculated molecular structure revealed that the structures are largely unchanged. Based on the above information, finally, the B3LYP/6-31+g(d,p) level was selected to calculate their charge transport property.

**Table S1** Calculation results of frontier molecular orbitals (HOMO/LUMO) for different functionals and basis sets. (Unit: eV)

|                      | <u>B3LYP/6-31g(d)</u> |       |      | <u>B3LYP/6-31g(d,p)</u> |       |      | <u>B3LYP/6-31+g(d,p)</u> |       |      | <u>EXP.</u> |       |      |
|----------------------|-----------------------|-------|------|-------------------------|-------|------|--------------------------|-------|------|-------------|-------|------|
|                      | HOMO                  | LUMO  | Gap  | HOMO                    | LUMO  | Gap  | HOMO                     | LUMO  | Gap  | HOMO        | LUMO  | Gap  |
| $\alpha$ -<br>BEPAnt | -4.99                 | -1.77 | 3.23 | -5.00                   | -1.78 | 3.23 | -5.26                    | -2.07 | 3.19 |             |       |      |
|                      |                       |       |      |                         |       |      |                          |       |      | -5.49       | -2.77 | 2.72 |
| $\beta$ -<br>BEPAnt  | -5.03                 | -1.81 | 3.22 | -5.04                   | -1.82 | 3.22 | -5.30                    | -2.12 | 3.18 |             |       |      |
| BOPAnt               | -4.85                 | -1.69 | 3.16 | -4.86                   | -1.70 | 3.16 | -5.13                    | -2.01 | 3.12 | -5.45       | -2.76 | 2.69 |
| BSPAnt               | -4.97                 | -1.85 | 3.12 | -4.98                   | -1.86 | 3.12 | -5.22                    | -2.15 | 3.07 | -5.60       | -2.72 | 2.88 |
|                      | <u>PBE0/6-31g(d)</u>  |       |      | <u>PBE0/6-31g(d,p)</u>  |       |      | <u>PBE0/6-31+g(d,p)</u>  |       |      |             |       |      |
|                      | HOMO                  | LUMO  | Gap  | HOMO                    | LUMO  | Gap  | HOMO                     | LUMO  | Gap  |             |       |      |
| $\alpha$ -<br>BEPAnt | -5.24                 | -1.71 | 3.53 | -5.25                   | -1.71 | 3.53 | -5.45                    | -1.95 | 3.5  |             |       |      |
| $\beta$ -<br>BEPAnt  | -5.28                 | -1.75 | 3.52 | -5.28                   | -1.76 | 3.52 | -5.49                    | -2.00 | 3.49 |             |       |      |
| BOPAnt               | -5.10                 | -1.63 | 3.47 | -5.10                   | -1.64 | 3.46 | -5.32                    | -1.89 | 3.43 |             |       |      |
| BSPAnt               | -5.21                 | -1.79 | 3.42 | -5.22                   | -1.80 | 3.42 | -5.4                     | -2.03 | 3.37 |             |       |      |

As for luminescence property, the spectral properties are easily influenced by different functionals. We tested the effect of different functionals on absorption and emission wavelengths and quantum yields of studied systems. Firstly, according to the maximum absorption wavelength measured experimentally, we narrow down the functional scope initially.

**Table S2** Calculated absorption wavelength under different computational functionals and 6-31g(d,p) basis set and the value of experimental measurement. (Unit: nm)

|                  | B3LYP  | PBE0   | M06-2X | wB97XD | CAM-B3LYP | EXP.-abs(max) |
|------------------|--------|--------|--------|--------|-----------|---------------|
| $\alpha$ -BEPAnt | 422.15 | 409.53 | 367.50 | 363.67 | 369.15    | 400~450 nm    |
| $\beta$ -BEPAnt  | 423.71 | 410.89 | 368.35 | 364.28 | 369.85    |               |
| BOPAnt           | 432.30 | 418.38 | 372.59 | 367.50 | 373.79    |               |
| BSPAnt           | 437.72 | 422.78 | 373.82 | 367.25 | 373.98    |               |

From the table above, it can be found that B3LYP or PBE0 functionals combined with 6-31g(d,p) is suitable for the absorption transition property. Since the exact emission wavelength was not given in the experiment, only the blue fluorescence range (400-480nm, DOI: 10.1039/D1CC01145F) was mentioned. With this criterion, the calculation results by PBE0/6-31g(d,p) are considered to better describe the emission property of these molecules.

**Table S3** Calculated emission wavelength under BLYP/PBE0/6-31g(d,p) and the value of experimental measurement. (Unit: nm)

|                  | B3LYP  | PBE0 | EXP.-ems                                                     |
|------------------|--------|------|--------------------------------------------------------------|
| $\alpha$ -BEPAnt | 479.52 | 464  | blue-fluorescence<br>400-480 nm<br>(DOI: 10.1039/D1CC01145F) |
| $\beta$ -BEPAnt  | --     | --   |                                                              |
| BOPAnt           | 487.94 | 472  |                                                              |
| BSPAnt           | 491.44 | 475  |                                                              |

## Part 2 Supplementary Data

**Table S4** The molecular planarity parameter (MPP), span of deviation from plane (SDP) and maximal positive/negative deviation to the fitted plane for studied molecules.

| Ground state     | MPP/Å | SDP/Å | Maximal-positive/Å | Maximal-negative/Å |
|------------------|-------|-------|--------------------|--------------------|
| $\alpha$ -BEPAnt | 0.123 | 0.417 | 0.208              | -0.208             |
| $\beta$ -BEPAnt  | 0.136 | 0.435 | 0.217              | -0.218             |
| BOPAnt           | 0.153 | 0.554 | 0.277              | -0.277             |
| BSPAnt           | 0.159 | 0.541 | 0.271              | -0.271             |
| S1 state         | MPP/Å | SDP/Å | Maximal-positive/Å | Maximal-negative/Å |
| $\alpha$ -BEPAnt | 0.179 | 0.852 | 0.426              | -0.426             |
| $\beta$ -BEPAnt  | --    | --    | --                 | --                 |
| BOPAnt           | 0.153 | 0.489 | 0.244              | -0.245             |
| BSPAnt           | 0.187 | 0.805 | 0.402              | -0.403             |

**Table S5** The relative positions of different dimers in BEPAnt, BOPAnt and BSPAnt crystals.

|             |   | R/Å   | angle   | d <sub>long-axis</sub> /Å | d <sub>short-axis</sub> /Å | d <sub>face-to-face</sub> /Å |
|-------------|---|-------|---------|---------------------------|----------------------------|------------------------------|
| BEPAnt      | 1 | 4.901 | 48.09°  | --                        | --                         | --                           |
|             | 2 | 4.901 | 48.09°  | --                        | --                         | --                           |
|             | 3 | 6.043 | --      | 0.818                     | 5.459                      | 2.462                        |
| BOPAnt<br>+ | 1 | 4.830 | 43.710  | --                        | --                         | --                           |
|             | 2 | 4.830 | 43.710  | --                        | --                         | --                           |
|             | 3 | 6.163 | --      | 0.791                     | 5.666                      | 2.294                        |
| BSPAnt      | 1 | 4.881 | 45.656° | --                        | --                         | --                           |
|             | 2 | 4.890 | 45.656° | --                        | --                         | --                           |
|             | 3 | 6.034 | --      | 1.187                     | 5.440                      | 2.337                        |

**Table S6** Parameters of hole transport for studied structures.

|                        | $\lambda_h/\text{meV}$ | $r/\text{\AA}$ | Hole              | Rate k-60°C      | $\mu_h\text{-1D-60}^\circ\text{C}$ |
|------------------------|------------------------|----------------|-------------------|------------------|------------------------------------|
|                        |                        |                | $V_h(\text{meV})$ |                  |                                    |
| $\alpha\text{-BEPAnt}$ | 151.69                 | 4.901          | 38.32             | 6.6026521368E+13 | 2.90                               |
|                        |                        | 4.901          | 38.32             | 6.6026521368E+13 | 2.90                               |
|                        |                        | 6.043          | 20.50             | 1.8896228772E+13 | 1.19                               |
| $\beta\text{-BEPAnt}$  | 148.70                 | 4.901          | 38.32             | 6.9397571897E+13 | 2.94                               |
|                        |                        | 4.901          | 38.32             | 6.9397571897E+13 | 2.94                               |
|                        |                        | 6.043          | 20.50             | 1.9860994759E+13 | 1.28                               |
| $\text{BOPAnt}$        | 206.51                 | 4.830          | 33.73             | 2.5732034920E+13 | 1.11                               |
|                        |                        | 4.830          | 33.73             | 2.5732034920E+13 | 1.11                               |
|                        |                        | 6.163          | 10.90             | 2.6871656890E+12 | 0.18                               |
| $\text{BSPAnt}$        | 149.90                 | 4.881          | 18.17             | 9.8659713979E+12 | 0.40                               |
|                        |                        | 4.890          | 17.61             | 9.2672037034E+12 | 0.40                               |
|                        |                        | 6.034          | 3.13              | 2.9276467433E+11 | 0.02                               |

**Table S7 Theoretically and optimized and experimental cell parameters for these studied structures.**

| Exp.   |                      |                        |                 | Theo.               |                  |                     |                  |
|--------|----------------------|------------------------|-----------------|---------------------|------------------|---------------------|------------------|
| BEPAnt | Space group          | P21/c                  |                 | P21/c( $\alpha$ -)  |                  | P21( $\beta$ -)     |                  |
|        | Unit cell dimensions | a=22.66 Å              | $\alpha$ =90°   | a=22.662Å           | $\alpha$ =90°    | a=6.0426Å           | $\alpha$ =90°    |
|        |                      | b=7.72 Å               | $\beta$ =92.45° | b=7.7188 Å          | $\beta$ =92.479° | b=7.7188 Å          | $\beta$ =92.479° |
|        |                      | c=6.04 Å               | $\gamma$ =90°   | c=6.0426 Å          | $\gamma$ =90°    | c=22.662 Å          | $\gamma$ =90°    |
|        | Z                    | 2                      |                 | 2                   |                  | 2                   |                  |
|        | Volume               | 1056.00 Å <sup>3</sup> |                 | 1056 Å <sup>3</sup> |                  | 1056 Å <sup>3</sup> |                  |
| BOPAnt | Space group          | Pbca                   |                 | Pbca                |                  |                     |                  |
|        | Unit cell dimensions | a=7.44 Å               | $\alpha$ =90°   | a=7.4376 Å          |                  | $\alpha$ =90°       |                  |
|        |                      | b=6.16 Å               | $\beta$ =90°    | b=6.1629 Å          |                  | $\beta$ =90°        |                  |
|        |                      | c=42.30 Å              | $\gamma$ =90°   | c=42.296 Å          |                  | $\gamma$ =90°       |                  |
|        | Z                    | 4                      |                 | 4                   |                  |                     |                  |

|                      |             |                        |  |                        |                       |
|----------------------|-------------|------------------------|--|------------------------|-----------------------|
|                      | Volume      | 1938.71 Å <sup>3</sup> |  | 1938.71 Å <sup>3</sup> |                       |
| <b>BSPAnt</b>        | Space group | P-1                    |  | P-1                    |                       |
| Unit cell dimensions | a=6.03 Å    | $\alpha=92.83^\circ$   |  | a=6.0345 Å             | $\alpha=92.827^\circ$ |
|                      | b=7.68 Å    | $\beta=96.55^\circ$    |  | b=7.6843 Å             | $\beta=96.554^\circ$  |
|                      | c=22.61 Å   | $\gamma=90.10^\circ$   |  | c=22.6054 Å            | $\gamma=90.103^\circ$ |
|                      | Z           | 2                      |  | 2                      |                       |
|                      | Volume      | 1040.09 Å <sup>3</sup> |  | 1040.09 Å <sup>3</sup> |                       |

**Table S8** The parameters of morphology predictions for BOPAnt and BSPAnt by means of AE model ( $\{h\ k\ l\}$ : the Miller index of the growth facet. Multiplicity: symmetry multiplicity of the facets.  $d_{hkl}$ : interplanar distance. %of Total Facet Area: the percentage of the total habit surface area occupied by all symmetry images of the facet. ).

| <b>BOPAnt</b>                                                                                                                             |              |                       |                      |                                                             |            |
|-------------------------------------------------------------------------------------------------------------------------------------------|--------------|-----------------------|----------------------|-------------------------------------------------------------|------------|
| MI index<br>$\{h\ k\ l\}$                                                                                                                 | Multiplicity | $d_{hkl}(\text{\AA})$ | %of Total Facet Area | $E_{att}$<br>(KJ/mol)                                       | Rate ratio |
| $\{0\ 0\ 2\}$ , $\{0\ 0\ -2\}$                                                                                                            | 2            | 21.148                | 76.6588              | -17.3582<br>( $E_{vdW}$ :-15.5471<br>$E_{ele}$ :-1.81117)   | 1          |
| $\{1\ 0\ 2\}$ , $\{1\ 0\ -2\}$<br>$\{-1\ 0\ -2\}$ , $\{-1\ 0\ 2\}$                                                                        | 4            | 7.016                 | 10.3133              | -96.3327<br>( $E_{vdW}$ :-81.9669<br>$E_{ele}$ :-14.3658)   | 5.55       |
| $\{1\ 1\ 1\}$ , $\{-1\ 1\ 1\}$<br>$\{1\ -1\ 1\}$ , $\{1\ 1\ -1\}$<br>$\{-1\ -1\}$ , $\{-1\ 1\ -1\}$<br>$\{1\ -1\ -1\}$ , $\{-1\ -1\ -1\}$ | 8            | 4.716                 | 13.0279              | -137.7602<br>( $E_{vdW}$ :-113.7600<br>$E_{ele}$ :-24.5408) | 7.94       |
| <b>BSPAnt</b>                                                                                                                             |              |                       |                      |                                                             |            |
| MI index<br>$\{h\ k\ l\}$                                                                                                                 | Multiplicity | $d_{hkl}(\text{\AA})$ | %of Total Facet Area | $E_{att}$<br>(KJ/mol )                                      | Rate ratio |
| $\{0\ 0\ 1\}$ , $\{0\ 0\ -1\}$                                                                                                            | 2            | 22.430                | 81.3283              | -6.2630<br>( $E_{vdW}$ :-6.03774<br>$E_{ele}$ :-0.2252)     | 1          |
| $\{0\ 1\ 0\}$ , $\{0\ -1\ 0\}$                                                                                                            | 2            | 7.675                 | 10.1466              | -42.7393<br>( $E_{vdW}$ :-36.5608<br>$E_{ele}$ :-6.17852)   | 6.82       |

|                      |   |       |        |                                                                         |       |
|----------------------|---|-------|--------|-------------------------------------------------------------------------|-------|
| {1 0 -1}, {-1 0 1}   | 2 | 5.964 | 5.0130 | -67.5263<br>(E <sub>vdW</sub> :--55.1873<br>E <sub>ele</sub> :-12.3390) | 10.78 |
| {1 1 -1}, {-1 1 1}   | 2 | 4.723 | 1.7243 | -70.5454<br>(E <sub>vdW</sub> :--58.1596<br>E <sub>ele</sub> :-12.3859) | 11.26 |
| {1 -1 -1}, {-1 -1 1} | 2 | 4.700 | 1.7877 | -69.8655<br>(E <sub>vdW</sub> :--57.4584<br>E <sub>ele</sub> :-12.4071) | 11.16 |

**Table S9** Electronic emission transitions of BEPAnt, BOPAnt and BSPAnt, calculated at the S<sub>1</sub> optimized geometry by TDDFT in QM/MM ONIOM. (ONIOM(PBE0/6-31g(d,p):uff).

|               | Excited States | Energy (eV) | QMMM(PBE0)      |          | Major contribution |
|---------------|----------------|-------------|-----------------|----------|--------------------|
|               |                |             | Wavelength (nm) | <i>f</i> |                    |
| <b>BEPAnt</b> | S1             | 2.6718      | 464.05          | 0.2889   | H->L (0.99)        |
| <b>BOPAnt</b> | S1             | 2.6296      | 471.50          | 0.3106   | H->L (0.99)        |
| <b>BSPAnt</b> | S1             | 2.6113      | 474.80          | 0.4795   | H->L (0.99)        |

**Table S10** Electronic absorption transitions of BEPAnt, BOPAnt and BSPAnt, calculated at the S<sub>0</sub><sup>opt</sup> optimized geometry by TDDFT in QM/MM.

|               | Excited States | QMMM(PBE0)  |                 | <i>f</i> | Major contribution |
|---------------|----------------|-------------|-----------------|----------|--------------------|
|               |                | Energy (eV) | Wavelength (nm) |          |                    |
| <b>BEPAnt</b> | S1             | 3.0275      | 409.53          | 0.2920   | H->L (0.98)        |
|               | S2             | 3.5142      | 352.80          | 0.0025   | H-1->L(0.54)       |
|               |                |             |                 |          | H->L+1(0.44)       |
|               | S3             | 4.0186      | 308.52          | 0.0000   | H-2->L(0.79)       |
|               |                |             |                 |          | H->L+2(0.19)       |
|               | S4             | 4.1453      | 299.10          | 2.6844   | H-1->L(0.43)       |
|               |                |             |                 |          | H->L+1(0.52)       |

|               |    |        |        |        |               |
|---------------|----|--------|--------|--------|---------------|
| <b>BOPAnt</b> | S1 | 2.9634 | 418.38 | 0.3168 | H->L (0.98)   |
|               | S2 | 3.4976 | 354.48 | 0.0039 | H-2->L (0.57) |
|               |    |        |        |        | H->L+1 (0.39) |
|               | S3 | 3.7957 | 326.64 | 0.0000 | H-1->L(0.93)  |
|               |    |        |        |        | H->L+2(0.05)  |
|               | S4 | 4.0613 | 305.28 | 2.3363 | H-3->L(0.03)  |
|               |    |        |        |        | H-2->L(0.40)  |
|               |    |        |        |        | H->L+1(0.54)  |
| <b>BSPAnt</b> | S1 | 2.9326 | 422.78 | 0.4758 | H->L (0.99)   |
|               | S2 | 3.4281 | 361.68 | 0.0173 | H-3->L(0.03)  |
|               |    |        |        |        | H-2->L(0.63)  |
|               |    |        |        |        | H->L+1(0.31)  |
|               | S3 | 3.5861 | 345.74 | 0.0000 | H-1->L(0.95)  |
|               |    |        |        |        | H->L+2(0.03)  |
|               | S4 | 3.8574 | 321.42 | 1.8928 | H-3->L(0.07)  |
|               |    |        |        |        | H-2->L(0.35)  |
|               |    |        |        |        | H->L+1(0.56)  |

---

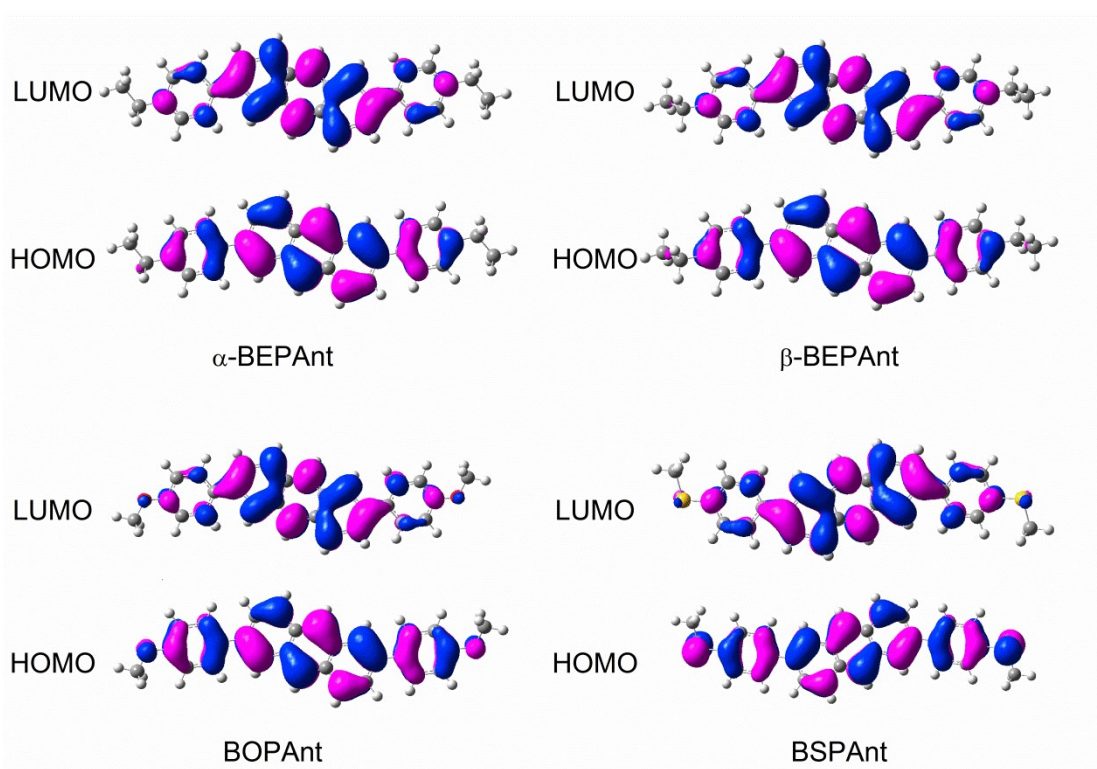

**Figure S1** The frontier molecular orbitals for BEPAnt, BOPAnt and BSPAnt.

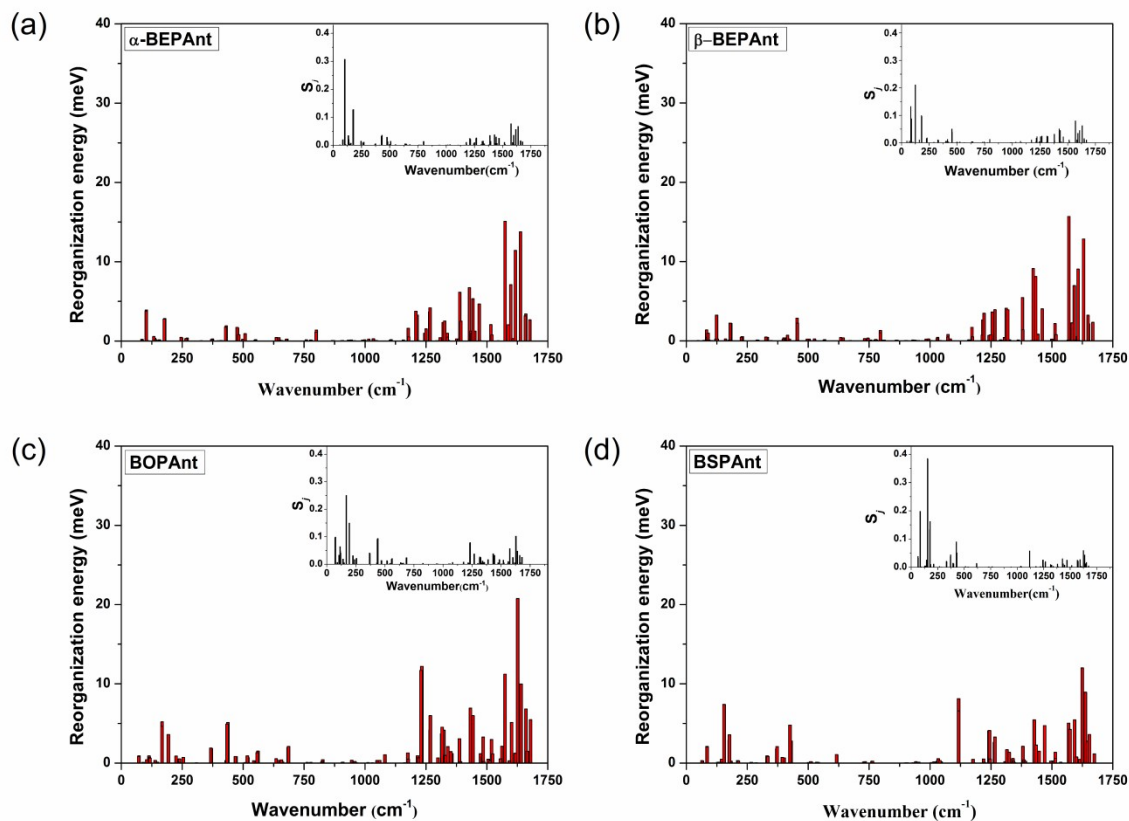

**Figure S2** The contributions of vibration to reorganization energies at the frequency range from 0 cm<sup>-1</sup> to 1750 cm<sup>-1</sup>.

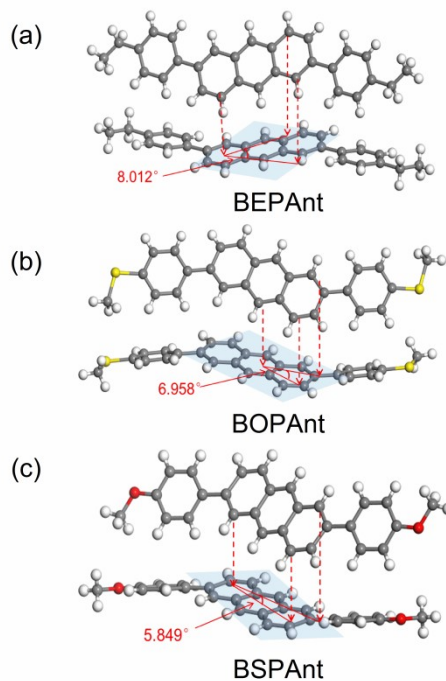

**Figure S3** The projection angle of a dimer in which one molecular skeleton is projected onto the other molecular skeleton.

(NOTE: This method is not universal, because the three crystals are packed in the same way, and the projection of the three selected C atoms in the upper molecule in the figure is in the anthracene skeleton

plane of the lower molecule, so this method can be used for comparison.)

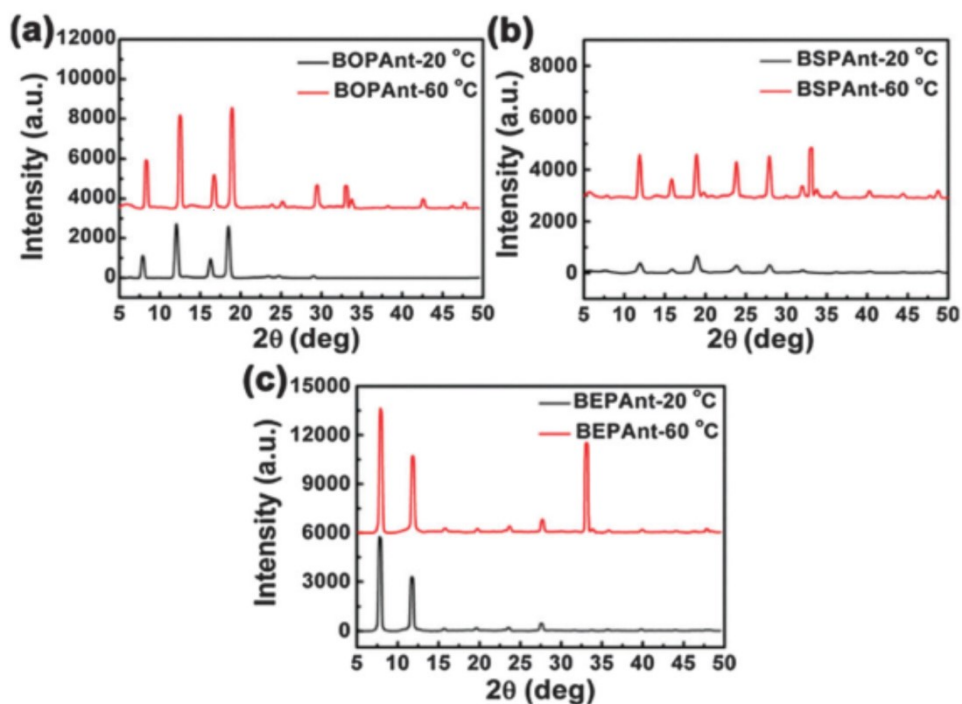

**Figure S4** XRD of the thin films ((a) BOPAnt, (b) BSPAnt, and (c) BEPAnt) deposited at 20 °C (black peaks) and at 60 °C (red peaks) in experiment.<sup>1</sup>

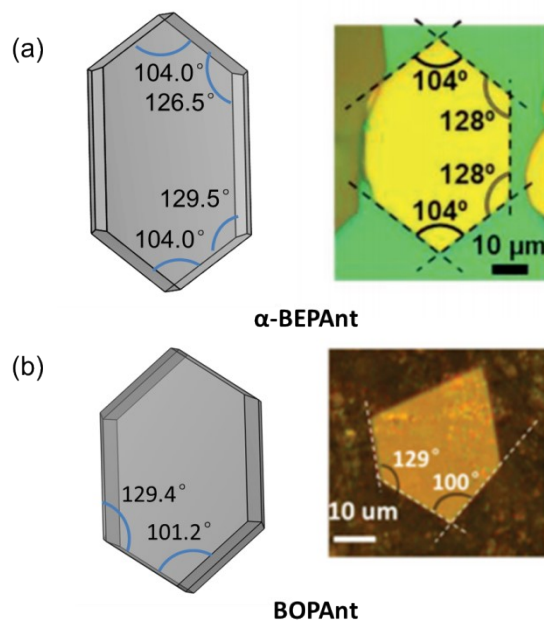

**Figure S5** The predicted morphology (left side) and measured morphology in experiment (right side) of  $\alpha$ -BEPAnt<sup>2</sup> and BOPAnt<sup>3</sup>.

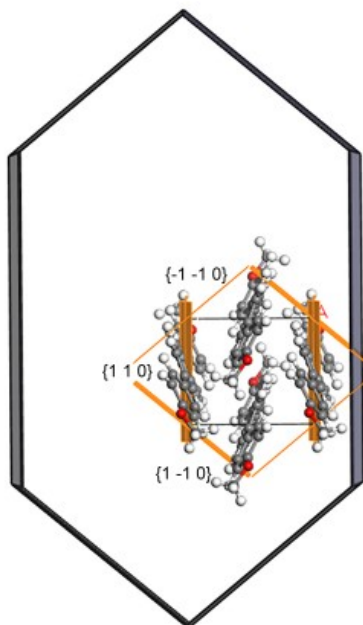

**Figure S6** The MI index facets of the predicted morphology (gray) and measured morphology in experiment (orange) of BOPAnt.<sup>2</sup>

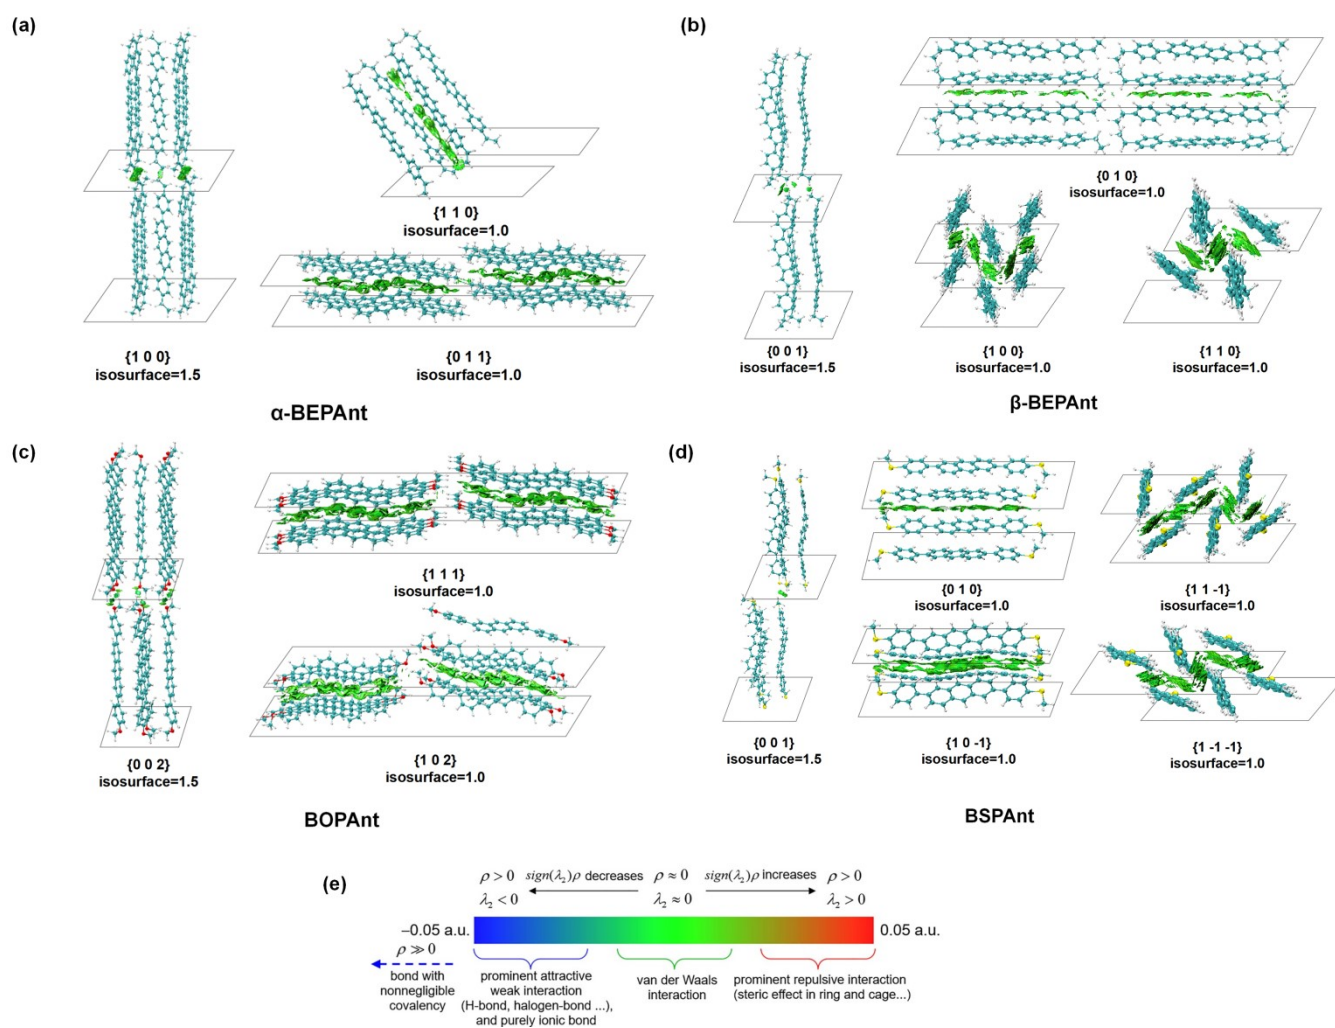

**Figure S7** Isosurface map of IRI for each growth facet of four systems. Isovalue of IRI is chosen to be 1.0 or 1.5. B3LYP-D3(BJ)/6-31g(d,p) level was employed in the calculation and standard coloring method and chemical explanation of  $\text{sign}(\lambda_2)\rho$  on IRI isosurfaces (e).

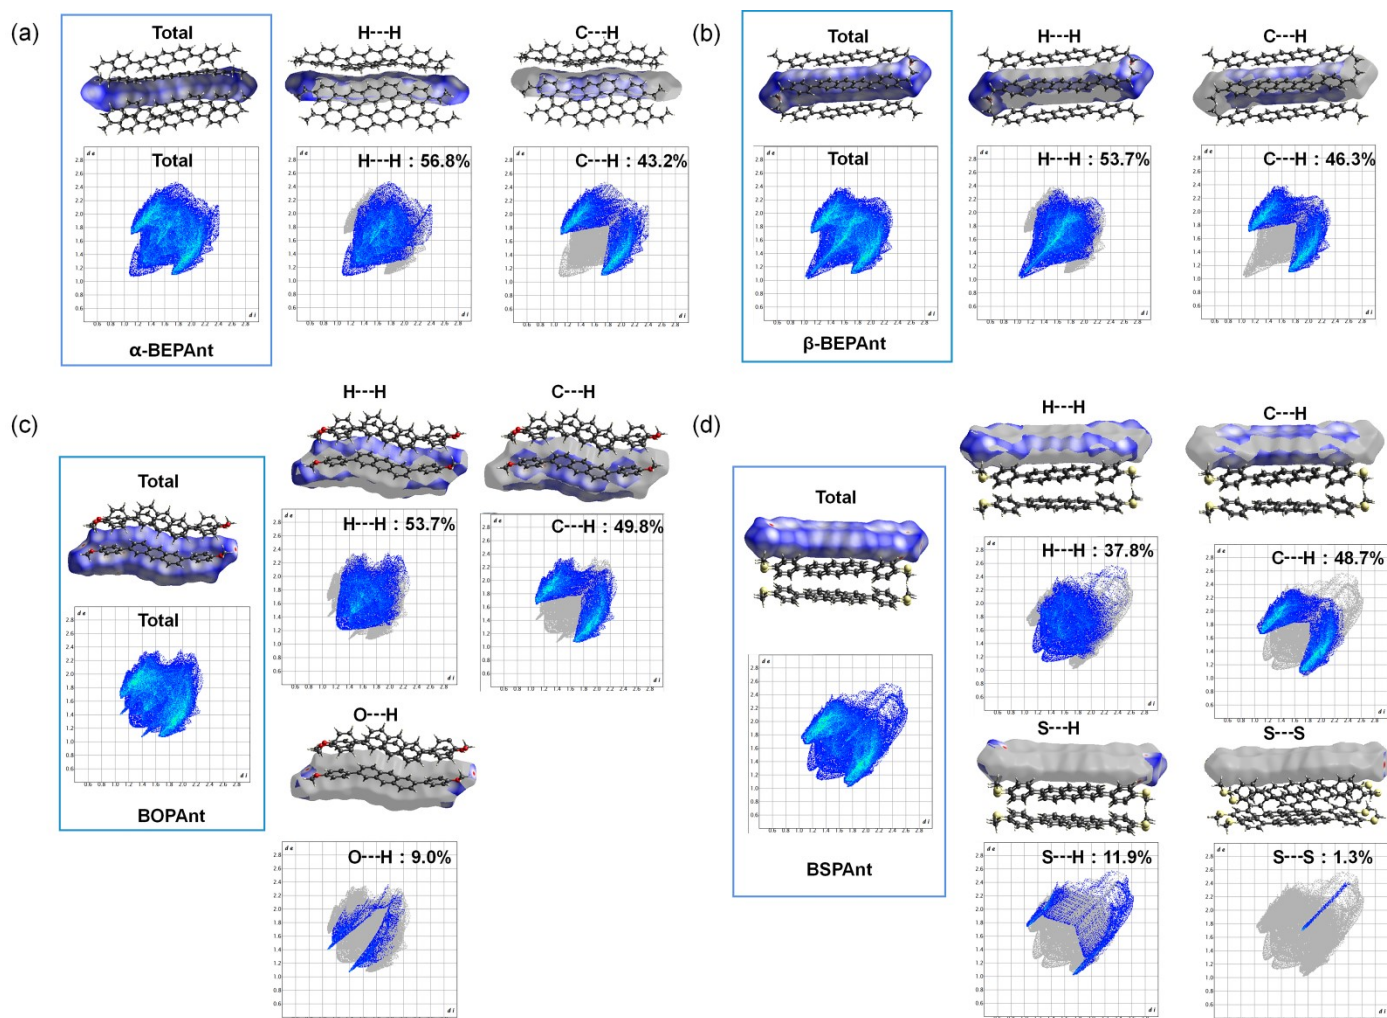

**Figure S8** Hirshfeld surfaces and decomposed fingerprint plots with close contact for  $\alpha$ -BEPAnt (a),  $\beta$ -BEPAnt (b), BOPAnt (c) and BSPAnt.

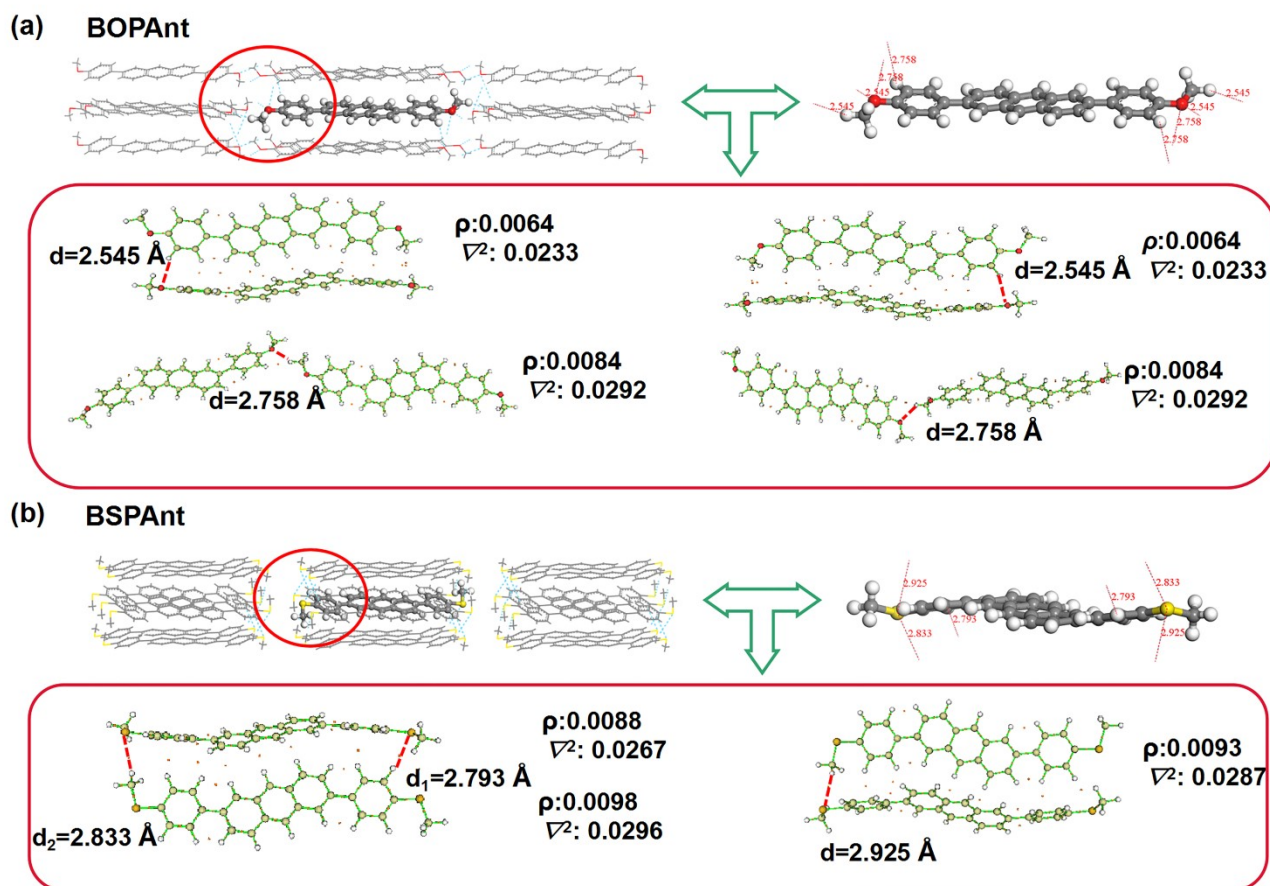

**Figure S9** The major C-H...O and C-H...S hydrogen bonds in BOPAnt and BSPAnt crystal (a) and (b).

Topological properties at the intermolecular C-H...O and C-H...S bond critical points.

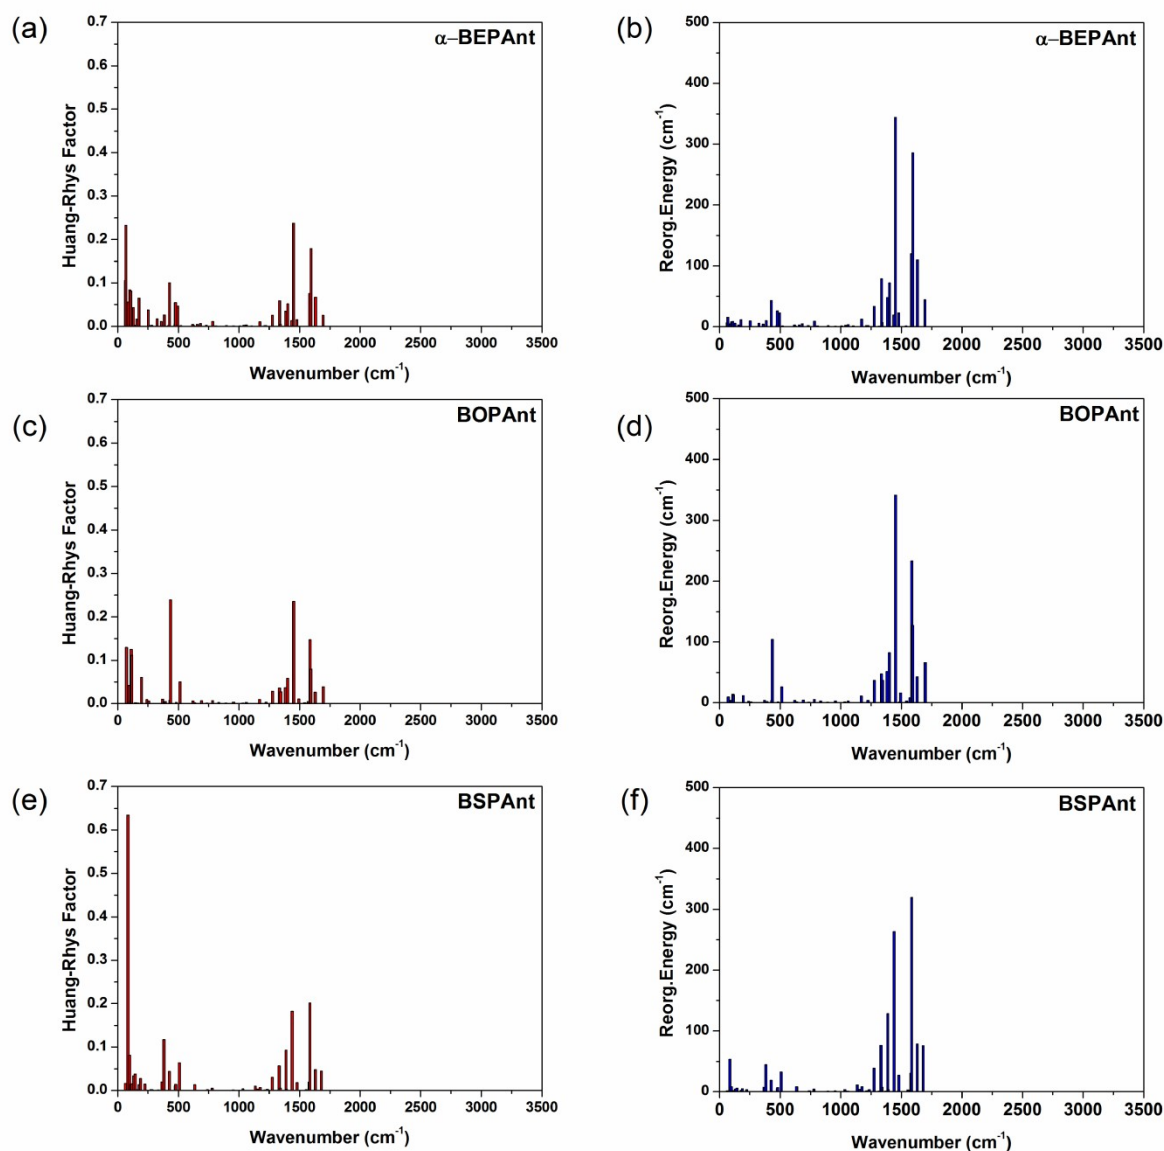

**Figure S10** The contributions of vibrations to reorganization energy and Huang–Rhys factor between  $S_0$  and  $S_1$  states.

## Reference

- [1] L. Yan, Y. Zhao, H. Yu, Z. Hu, Y. He, A. Li, O. Goto, C. Yan, T. Chen, R. Chen, Y.-L. Loo, D. F. Perepichka, H. Meng and W. Huang, *Journal of Materials Chemistry C*, 2016, **4**, 3517-3522.
- [2] C. He, A. Li, L. Yan, D. Zhang, Y. Zhu, H. Chen, H. Meng, O. Goto, 2D and 3D Crystal Formation of 2,6-Bis[4-ethylphenyl]anthracene with Isotropic High Charge-Carrier Mobility, *Advanced Electronic Materials*, 2017,**3**, 1700282.
- [3] A. Li, L. Yan, M. Liu, I. Murtaza, C. He, D. Zhang, Y. He, H. Meng, Highly responsive phototransistors based on 2, 6-bis (4-methoxyphenyl) anthracene single crystal, *Journal of Materials Chemistry C*, 2017,**5** 5304-5309.
